# Supplementary material for: Increased COVID-19 Infection Susceptibility and Adverse Outcomes Due to Obesity: A Systematic Review and Meta-analysis
Source: Research Square preprint supplement (doi:10.21203/rs.3.rs-244649/v1), 2021-03-03
Supplement: Supplementary file 1 [file 5840ac4c6327c3c5c6dd2ab9.docx]

# Table 1. Main characteristics of studies and related findings on the associations between COVID-19 and obesity

| Study ID | First author Publication Year | Country/  setting | Study design | Study sample size | Age (mean, median or range) (years) | Males (%) | Main findings on the associations, e.g. ORs 95%CI | Note: How obesity was measured |
| --- | --- | --- | --- | --- | --- | --- | --- | --- |
| **A. Associations between COVID-19 and obesity** | | | | | | | | |
| 1 | [Hu et al, 2020](https://www.ncbi.nlm.nih.gov/pmc/articles/PMC7197620/) | China | Cohort study | 323 | Mean 61 (range: 23-91) | 51.4 | Obesity prevalence: All patients: 4%, Non-severe cases: 3.8%, Severe cases: 4.3%, Critical cases 8%  Outcome unfavorable: 10.7%, Favorable: 2.9%. | Obesity (BMI >30 kg/m2). |
| 2^ | [Zheng et al, 202](https://www.ncbi.nlm.nih.gov/pmc/articles/PMC7166301/)0 | China | Cross-sectional study | 66 | Mean 47 (range:18-75) | 25.8 | Compared to those with non-severe COVID-19, patients with severe disease were more obese (89.5% vs. 59.6%, p = 0.021).  Association with obesity and COVID-19 severity (adjusted-OR 6.32, 95% CI 1.16–34.54). | Obesity: BMI >25 kg/m2.  All had metabolic associated fatty liver disease. |
| 3 | [Caussy et al, 2020](https://pubmed.ncbi.nlm.nih.gov/32314861/) | France | Cohort study | 291 | NA | NA | Higher requirement for IMV in severe obesity ≥35 kg/m2 compared to lean patients: 81.8% versus 41.9%, p=0.001. | Severe obesity: BMI ≥35 kg/m2. |
| 4 | [Simmonet et al, 2020](https://www.ncbi.nlm.nih.gov/pubmed/32271993) | France | Cohort study | 124 | Median 60 (range: 51- 70) | 73.0 | Obesity and severe obesity were significantly more frequent among SARS-CoV-2 participants than in non SARS-CoV-2 controls: 47.6% vs 25.2% and 28.2% vs 10.8%, respectively.  Admission to ICU: 47.5% presented with obesity, including class II obesity in 13.7% and with class III obesity in 14.5%. | Obesity (BMI >30 kg/m2) ;  Class II obesity (BMI 35-39.9 kg/m2); Class III obesity (BMI ≥40 kg/m2). |
| 5^ | [Docherty et al, 2020](https://www.medrxiv.org/content/10.1101/2020.04.23.20076042v1.full.pdf) | UK | Cohort study | 16,749 | Median 72 (range: 0-104) | 60.2 | Mortality  All obesity 1.37 (1.16-1.63, p<0.001). | as recognized by clinical staff |
| 6 | [ICNARC](https://www.icnarc.org/DataServices/Attachments/Download/a9875849-f16c-ea11-9124-00505601089b) | UK | Case report | 196 | Median 64 (range: 52-73) | 70.9 | 28.6% of patients had a BMI of 25-30, 29.6% had a BMI of 30-40 and 6.6% had a BMI of 40 or higher. | Obesity (BMI >30 kg/m2). |
| 7^ | [Kalligeros et at, 2020](https://www.ncbi.nlm.nih.gov/pubmed/32352637) | USA | Cohort study | 103 | Median 60 (range: 52-70) | 61.1 | 1) Admission to ICU: obesity (aOR:2.65; 95% CI 0.64-10.95); and severe obesity (aOR: 5.39; 95% CI1.13-25.64).  2) Use of IMV: obesity (aOR: 6.85; 95% CI 1.05-44.82); and severe obesity (aOR: 9.99; 95% CI 1.39-71.69). | Obesity (BMI 30-34.9 kg/m2);  Severe obesity (BMI≥35 kg/m2). |
| 8^ | [Lighter et al, 2020](https://www.ncbi.nlm.nih.gov/pubmed/32271368) | USA | Cohort study | 3,615 | <60 and ≥60 | NA | 1) <60 years:  Admission to acute care: obesity OR: 2.0 (95% CI 1.6-2.6), and severe obesity OR: 2.2 (95% CI 1.7-2.9).  Admission to ICU: obesity OR: 1.8 (95% CI 1.2-2.7), and severe obesity OR: 3.6 (95% CI 2.5-5.3).  2) ≥60 years：  Admission to acute care: obesity OR: 0.9 (95% CI 0.6-1.2), and severe obesity OR: 0.9 (95% CI 0.6-1.3).  Admission to ICU: obesity OR: 1.1 (95% CI 0.8-1.7), and severe obesity OR: 1.5 (95% CI 0.9-2.3). | Obesity BMI 30-34 kg/m2;  Severe obesity BMI >35 kg/m2. |
| 9^ | [Williamson et al, 2020](https://www.medrxiv.org/content/10.1101/2020.05.06.20092999v1.full.pdf) | UK (England) | Cohort study | 17,425,445  (5,683 COVID-19 deaths) | >18 | 49.9 | Incidence  Not obese 1.00 (ref)  Obese class I: 1.27 (1.18-1.36);  Obese class II: 1.56 (1.41-1.73);  Obese class III: 2.27 (1.99-2.58). | Obese class I (30-34.9kg/m2)  Obese class II (35-39.9kg/m2)  Obese class III (≥40 kg/m2) |
| **B. Obesity related behaviors (e.g. eating and physical activity)** | | | | | | | | |
| 10 | P[ietrobelli et al, 2020](https://onlinelibrary.wiley.com/doi/abs/10.1002/oby.22861) | Italy | Cohort study | 41 | Mean 13.0±3.1 (range: 6-18) | 53.7 | 1) Meals (#/day) change: 1.15±1.56; 95% CI: 0.65/1.64  2) Potato chips change: 0.54±0.86; 95% CI: 0.26/0.81  3) Red meat change: 1.66±2.10;  95% CI: 1.00/2.32  4) Sugary drinks (#/day) change: 0.50±1.08; 95% CI: 0.16/0.84  5) Screen time (hrs/day) change: 4.85±2.40; 95% CI: 4.10/5.61  6) Sleep time (hrs/day) change: 0.65±1.29; 95% CI: 0.24/1.05  7) Sports(hrs/week) change:  -2.30±4.60; 95% CI: -3.76/-0.85 | Baseline BMI was about 30.5 kg/m2 in males and 29.7 kg/m2 in females |

Abbreviation: CI: confidence intervals; ICU: Intensive Care Unit; IMV: Invasive Mechanical Ventilation; COVID-19: Coronavirus Disease 2019; aOR, adjusted OR; WHO: World Health Organization.

^ These studies were included in our meta-analyses, because the effect sizes (OR and 95% CI) were reported.

**Table 2. Overall results of meta-analysis and sub-group analysis of the associations between COVID-19 and obesity**

|  | Number of studies/  Analyses* | Effect size (95%CI) | P value | Heterogeneity | | | |
| --- | --- | --- | --- | --- | --- | --- | --- |
| I2 (%) | χ2 | P value | Tau-squared |
| **Total** | 17 | 1.69 (1.41, 2.02) | <0.001 | 87.3 | 126.48 | <0.001 | 0.0838 |
| **Country** |  |  |  |  |  |  |  |
| USA | 12 | 1.80 (1.32, 2.46) | <0.001 | 80.7 | 57.12 | <0.001 | 0.1945 |
| UK | 4 | 1.57 (1.23, 2.02) | <0.001 | 95.1 | 61.29 | <0.001 | 0.0605 |
| China | 1 | 6.32 (1.16, 34.48) | 0.033 | … | … | … | … |
| **Study design** |  |  |  |  |  |  |  |
| cohort study | 16 | 1.66 (1.39, 1.99) | <0.001 | 87.9 | 123.73 | <0.001 | 0.0826 |
| cross-sectional study | 1 | 6.32 (1.16, 34.48) | 0.033 | … | … | … | … |
| **Obesity classifications** |  |  |  |  |  |  |  |
| obesity | 9 | 1.43 (1.18, 1.73) | <0.001 | 71.0 | 27.56 | 0.001 | 0.0417 |
| severe obesity | 8 | 1.96 (1.49, 2.59) | <0.001 | 86.7 | 52.55 | <0.001 | 0.0997 |
| **COVID-19 severity** |  |  |  |  |  |  |  |
| COVID-19 admission | 2 | 2.31 (0.56, 9.56) | 0.248 | 67.6 | 3.09 | 0.079 | 0.7903 |
| ICU admission | 6 | 2.01 (1.25, 3,23) | 0.004 | 77.4 | 22.16 | <0.001 | 0.2290 |
| IMV use admission | 2 | 8.20 (2.10, 31.91) | 0.002 | 0.0 | 0.07 | 0.786 | 0.0000 |
| Acute care admission | 4 | 1.40 (0.88, 2.22) | 0.155 | 89.2 | 27.79 | <0.001 | 0.1956 |
| The death of COVID-19 | 3 | 1.64 (1.20, 2.25) | 0.002 | 96.7 | 60.57 | <0.001 | 0.0740 |

Abbreviation: CI: confidence intervals; ICU: Intensive Care Unit; IMV: Invasive Mechanical Ventilation; COVID-19: Coronavirus Disease 2019.

*Results from five studies (reported 17 analyses, including for different related outcomes and subgroups) were included in the meta-analysis. A fixed-effect model was fit when modest to moderate heterogeneity was present, and a random-effects model was fit when substantial to considerable heterogeneity was present.

**Table 3. Results of meta-regression analyses of age and gender differences on the association between COVID-19 and obesity***

|  | β | 95% CI | P-value | R2 |
| --- | --- | --- | --- | --- |
| Age | -0.29 | -0.47, -0.10 | 0.005 | 26.01 |
| Gender | 0.01 | -0.15, 0.17 | 0.859 |  |

*Meta-regression analyses based on results from five studies were performed to determine whether subjects’ age (in years) and gender (% of males) affected the association between COVID-19 and obesity.
